# Supplementary material for: Microglia remodel synapses by presynaptic trogocytosis and spine head filopodia induction
Source: Nat Commun. 2018 Mar 26;9:1228. doi: 10.1038/s41467-018-03566-5 (PMC5964317; doi:10.1038/s41467-018-03566-5)
Supplement: Supplementary file 1 — Supplementary Information(PDF 4849 kb) [file 41467_2018_3566_MOESM1_ESM.pdf]

**Microglia remodel synapses by presynaptic trogocytosis and spine head filopodia induction.**

Weinhard et al.

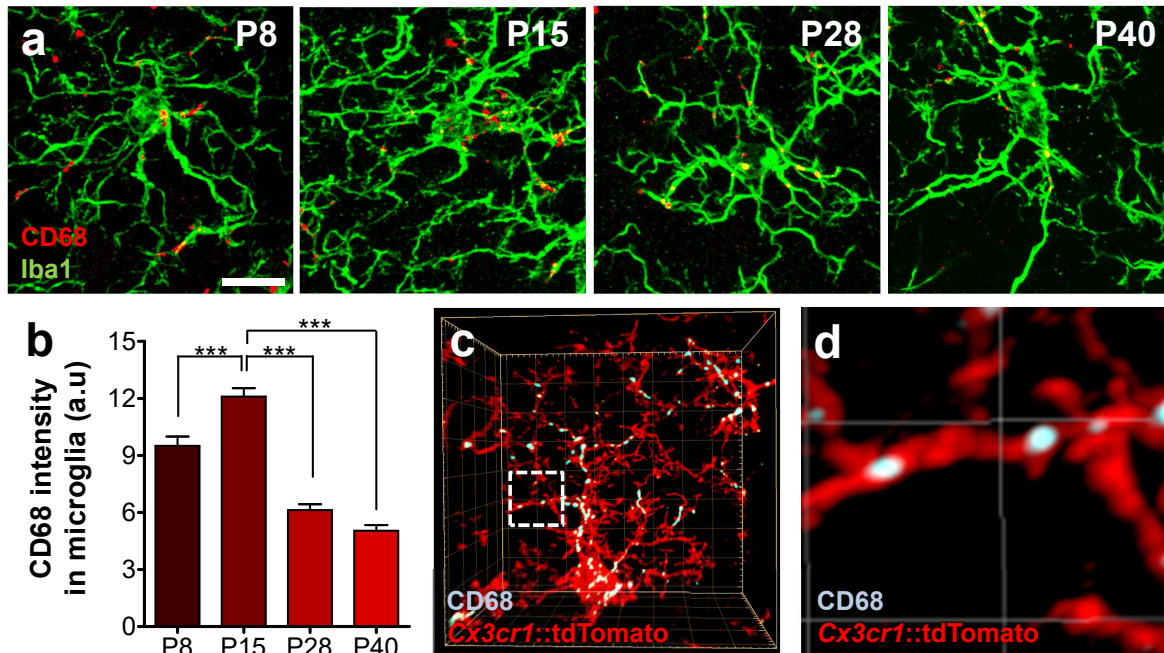

**Supplementary Figure 1. Microglia phagocytosis is developmentally regulated.** (a) Representative images of Iba1-labelled microglia (green) containing phagocytic compartments immunostained for CD68 (red) at P8, P15, P28 and P40 in the *stratum radiatum* of CA1 (scale bar = 10  $\mu$ m). (b) Quantification of CD68 intensity in microglia revealed a peak at P15 in CD68 intensity (\*\*\*)  $P < 0.001$ , two-way ANOVA with Bonferroni *post hoc* test,  $n = 120$  cells from 6 animals per age group error, error bars are mean + s.e.m). (c) Genetically-labelled microglia (red, *Cx3cr1::CreER*; *RC::LSL-tdTomato*) showed similar CD68 expression pattern as Iba1-stained microglia at P15 (enlarged process in [d], grid line increment = 5  $\mu$ m).

### Example 1

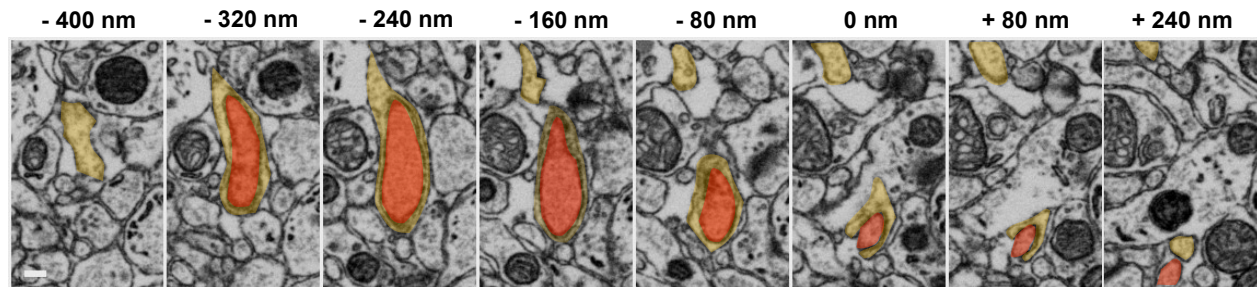

### Example 2

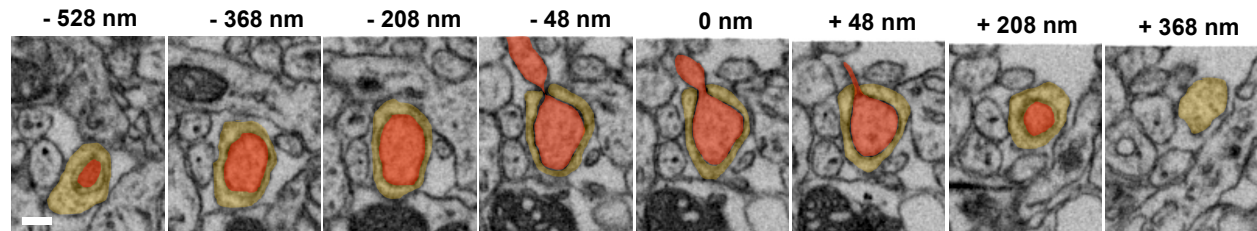

### Example 3

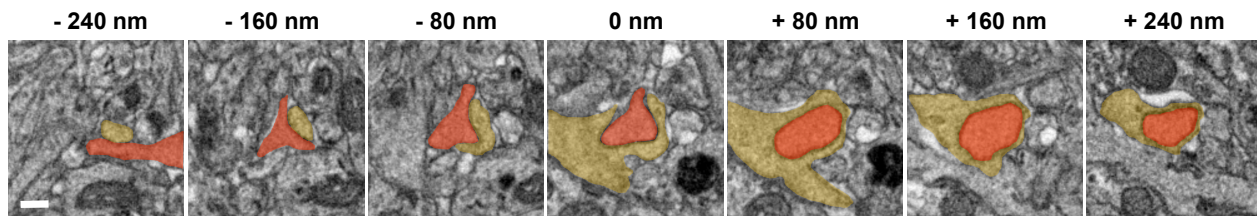

**Supplementary Figure 2. Microglia self-engulfment.** Representative examples of microglia (yellow) engulfing other microglial processes (orange). In each example, the point of maximum constriction is centred at 0 nm (scale bar = 200 nm).

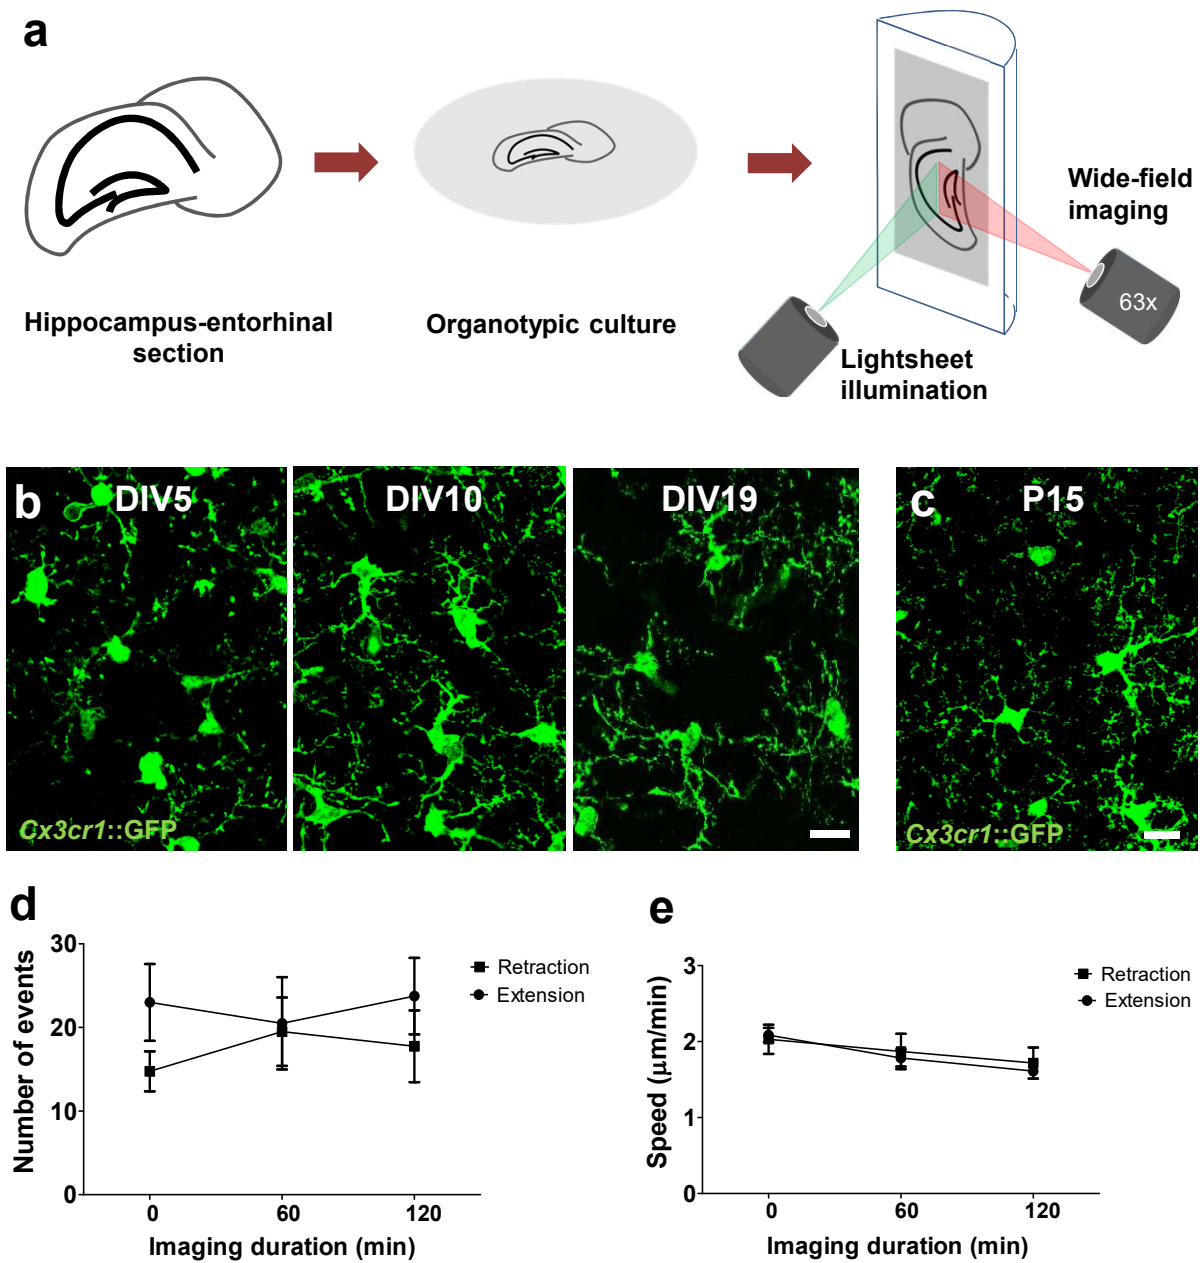

**Supplementary Figure 3. Microglia show normal morphology and motility in organotypic cultures.** (a) Schematic showing the preparation of organotypic hippocampal slice cultures for time-lapse imaging with light sheet microscopy. (b) Representative confocal images of microglia (green, *Cx3cr1::GFP*) in fixed slice cultures at 5, 10 and 17 days *in vitro* (DIV). Note the progressive ramification of microglia over time. (c) Representative confocal image of microglia in fixed tissue at 15 postnatal days *in vivo* (P15). Note that the morphology is similar to 10-19 DIV slice cultures. (d,e) Characterization of microglia motility in slice cultures from *Cx3cr1::CreER*; *RC::LSL-tdTomato* mice using time-lapse light sheet imaging (see *supplementary movie 4*) by quantification of (d) number (two-way ANOVA, main effect of time:  $F_{2,12} = 0.22$ ,  $p = 0.81$ ; main effect of direction:  $F_{1,12} = 0.96$ ,  $p = 0.37$ ) and (e) speed of process extension and retraction events (two-way ANOVA, main effect of time:  $F_{2,12} = 3.48$ ,  $p = 0.06$ ; main effect of direction:  $F_{1,12} = 0.10$ ,  $p = 0.77$ ,  $n = 4$  cells from 3 organotypic slice cultures, error bars are mean  $\pm$  s.e.m, scale bar = 10  $\mu$ m).

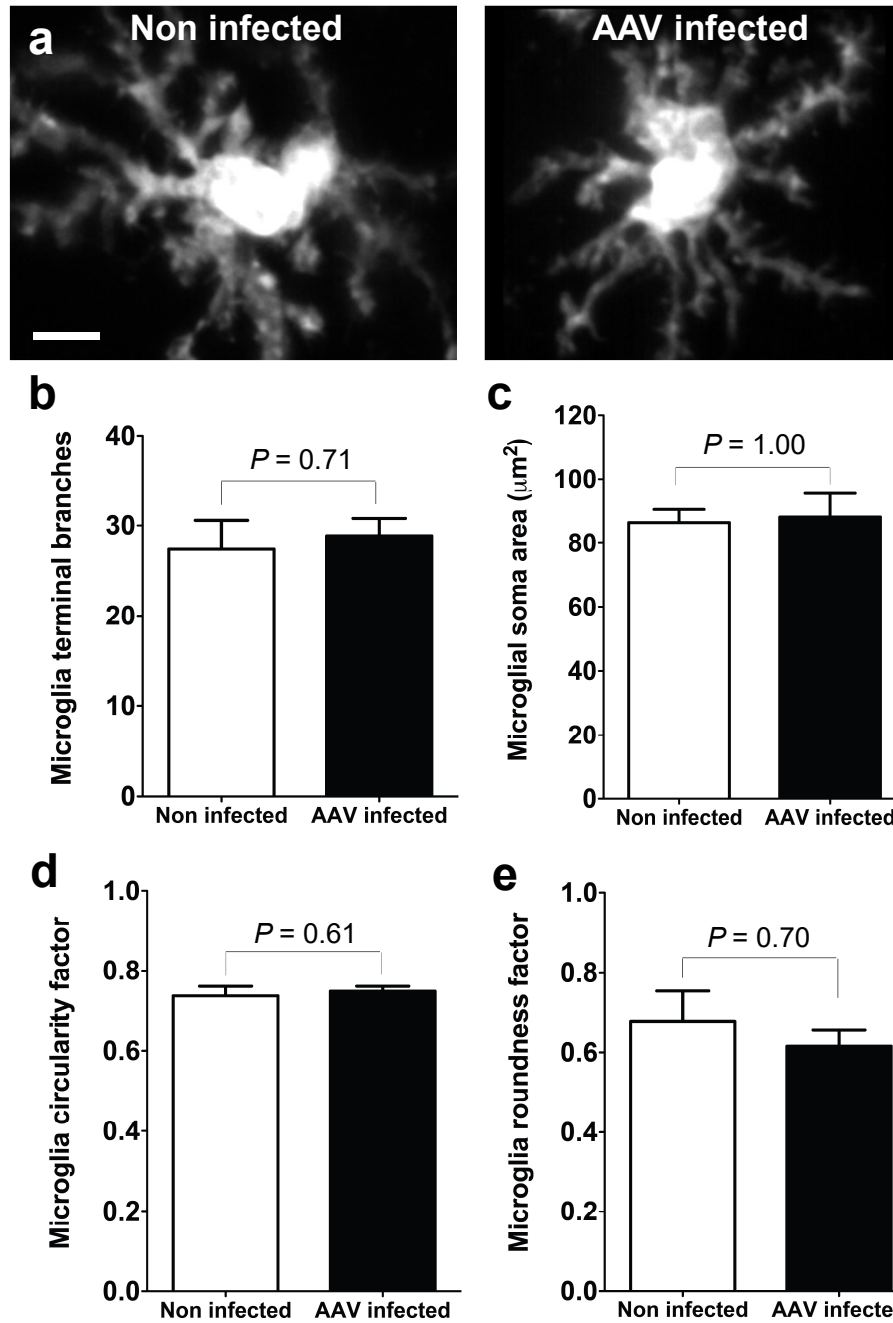

**Supplementary Figure 4. No difference in CA1 microglia morphology upon AAV infection of CA3.** (a) Representative images of microglia in the CA1 region of non-infected versus AAV-infected hippocampal slices two weeks after CA3 infection (stack projection of 40 consecutive optical sections,  $\Delta z = 0.48 \mu\text{m}$ ). No differences were found in microglia (b) terminal branches, (c) soma area, (d) circularity, and (e) roundness ([b] two-sided unpaired t-test, [c,d] Two-sided Mann-Whitney test,  $n = 7$  cells from 3 organotypic slice cultures per group, error bars are mean + s.e.m, scale bar =  $5 \mu\text{m}$ ).

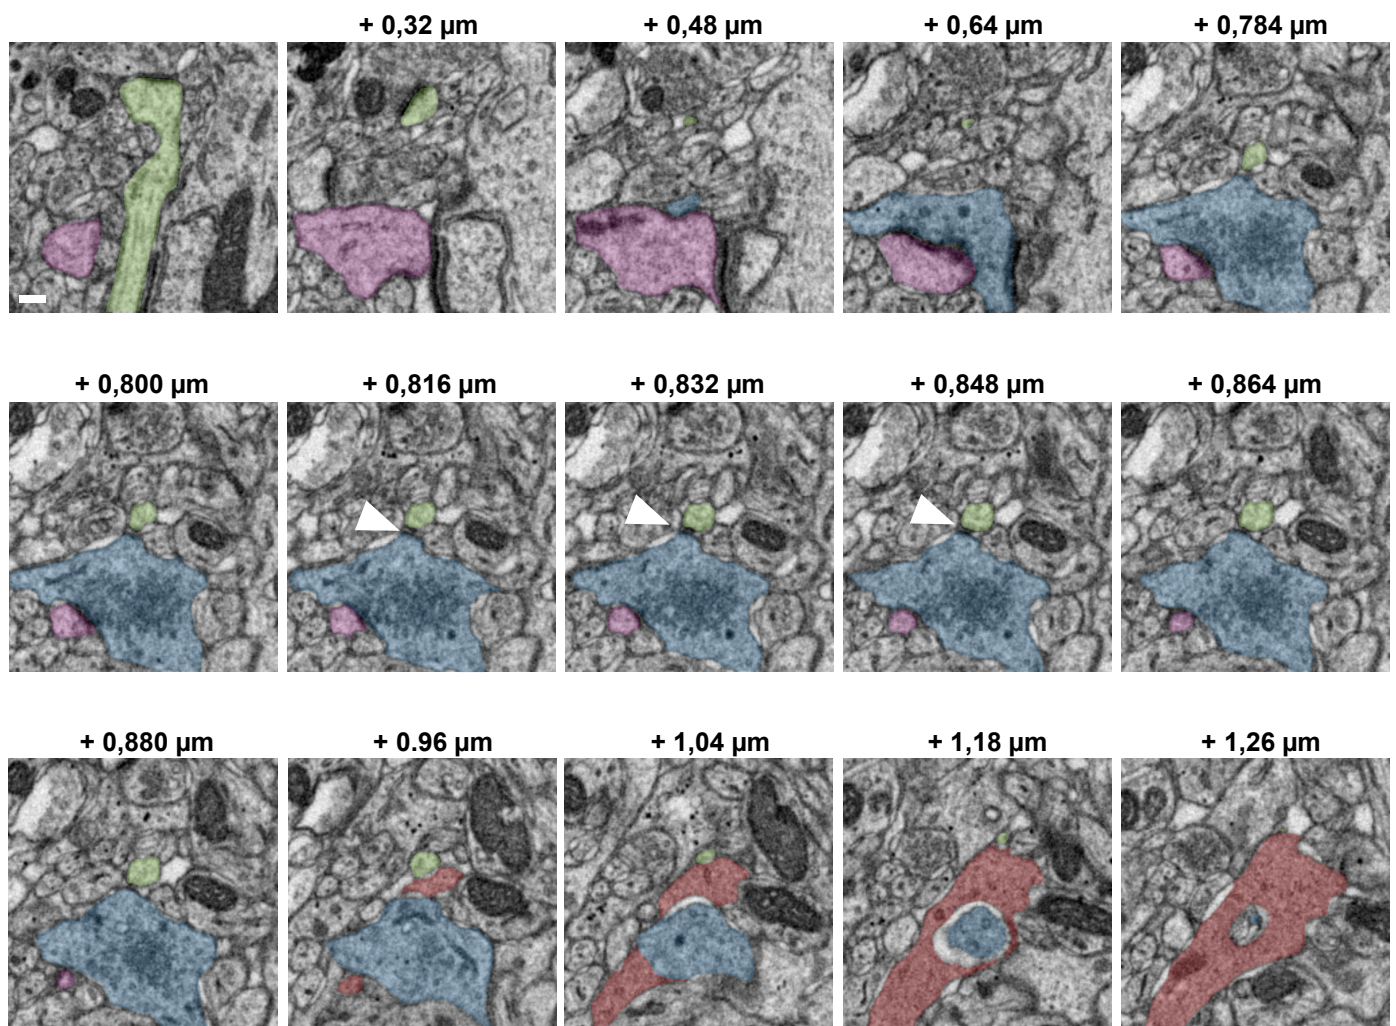

**Supplementary Figure 5. FIB-SEM image sequence showing formation an MSB.** A spine and its spine head filopodia (green) converging toward a microglial process (red) forms a nascent synapse (white arrows) identified by the presence of a post-synaptic density (PSD) and no presynaptic vesicles at the site of bouton (blue) contact. Note that the contacted bouton already makes a mature synapse with another dendritic spine (magenta), resulting in the formation of a multiple-synapse bouton (MSB, scale bar = 200 nm).

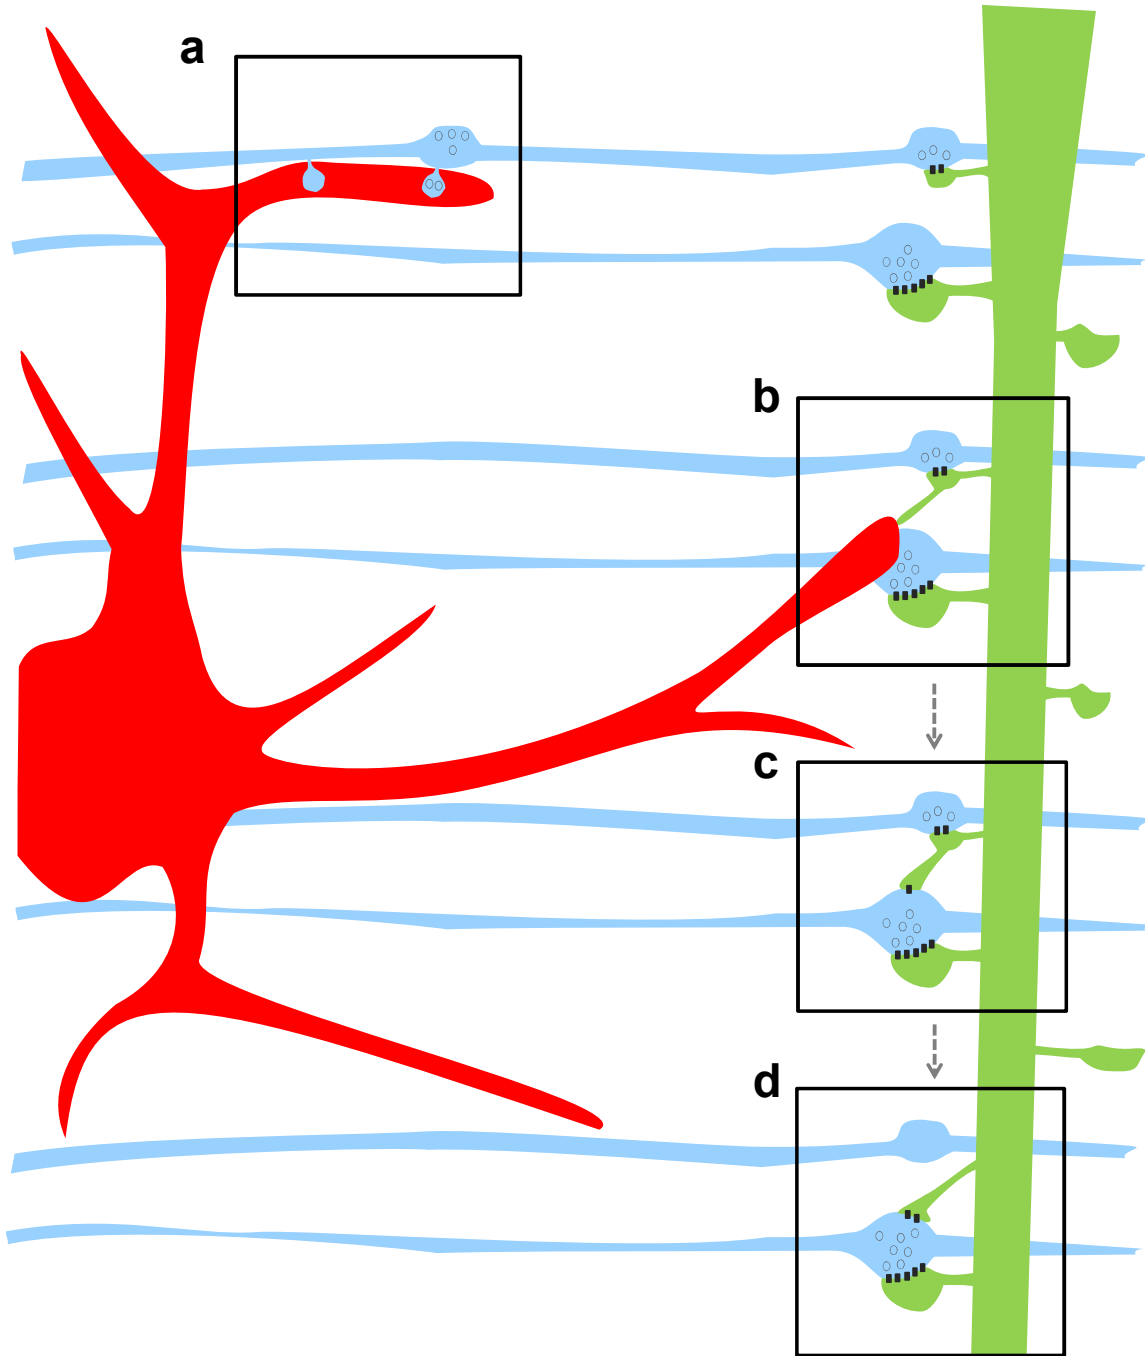

**Supplementary Figure 6. Proposed role for microglia in synaptic remodeling.** (a) Microglia (red) eliminate synaptic material by trophocytosis of presynaptic structures (blue), including both synaptic boutons and axonal shafts. (b) Microglia do not eliminate postsynaptic material (green), but frequently induce filopodia formation from mature, synapse-bearing spines. (c) The induction of spine head filopodia is occasionally followed by spine switching, a process in which the filopodia facilitates the relocation of the spine head to a new bouton. (d) In most cases, this is likely to result in the formation of a multiple synaptic bouton (MSB).
